# Supplementary material for: Preparation of graphene hollow spheres from vacuum residue of ultra-heavy oil as an effective oxygen electrode for Li–O2batteries
Source: Royal Society of Chemistry journal article supplement (doi:10.1039/c7ta10746c), 2018-01-01
Supplement: c7ta10746c1.pdf [file c7ta10746c1.pdf]

## Electronic Supplementary Information

### Preparation of graphene hollow sphere from vacuum residue of ultra-heavy oil as effective oxygen electrode in Li-O<sub>2</sub> battery

Katie Heeyum Lim<sup>a,†</sup>, Sunhee Kim<sup>a,†</sup>, Heejun Kweon<sup>a</sup>, Seunghyun Moon<sup>a</sup>, Chang-Ha Lee<sup>a,\*</sup>  
and Hansung Kim<sup>a,\*</sup>

**Table S1.** Components of Vacuum Residue

| <b>Components of Vacuum Residue</b>    |       |
|----------------------------------------|-------|
| <b>Conradson carbon residue, wt. %</b> | 22.2  |
| <b>S, wt. %</b>                        | 5.3   |
| <b>N, wt. %</b>                        | 0.3   |
| <b>Ni, wppm</b>                        | 55.2  |
| <b>V, wppm</b>                         | 154.3 |
| <b>Fe, wppm</b>                        | 102.9 |

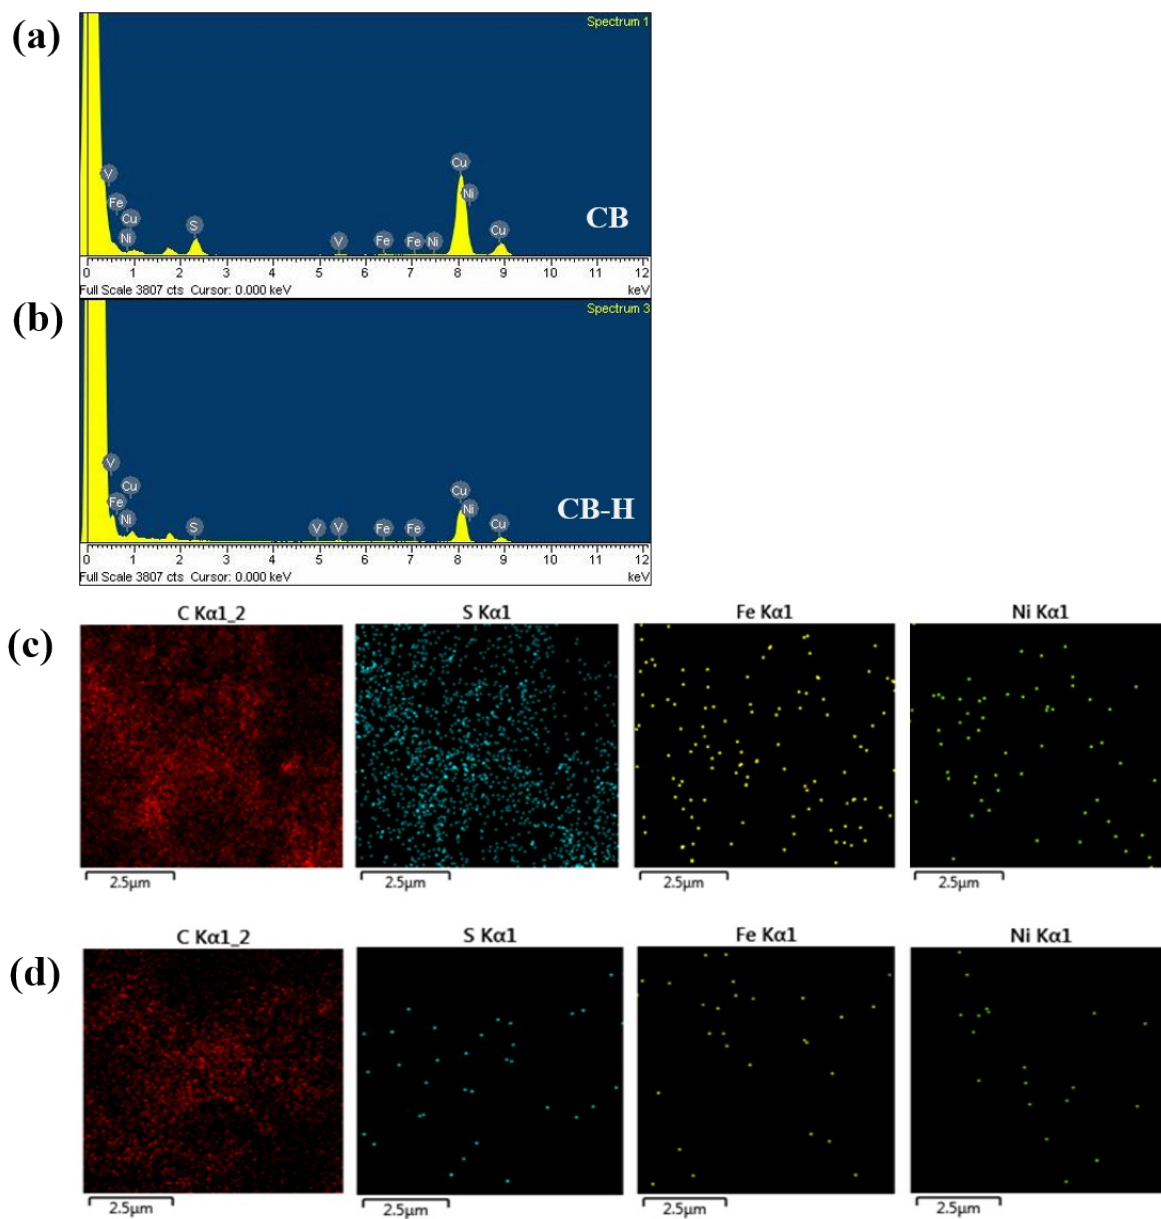

**Fig. S1** EDS spectra of (a) CB, (b) CB-H and mapping images of (c) CB and (d) CB-H.

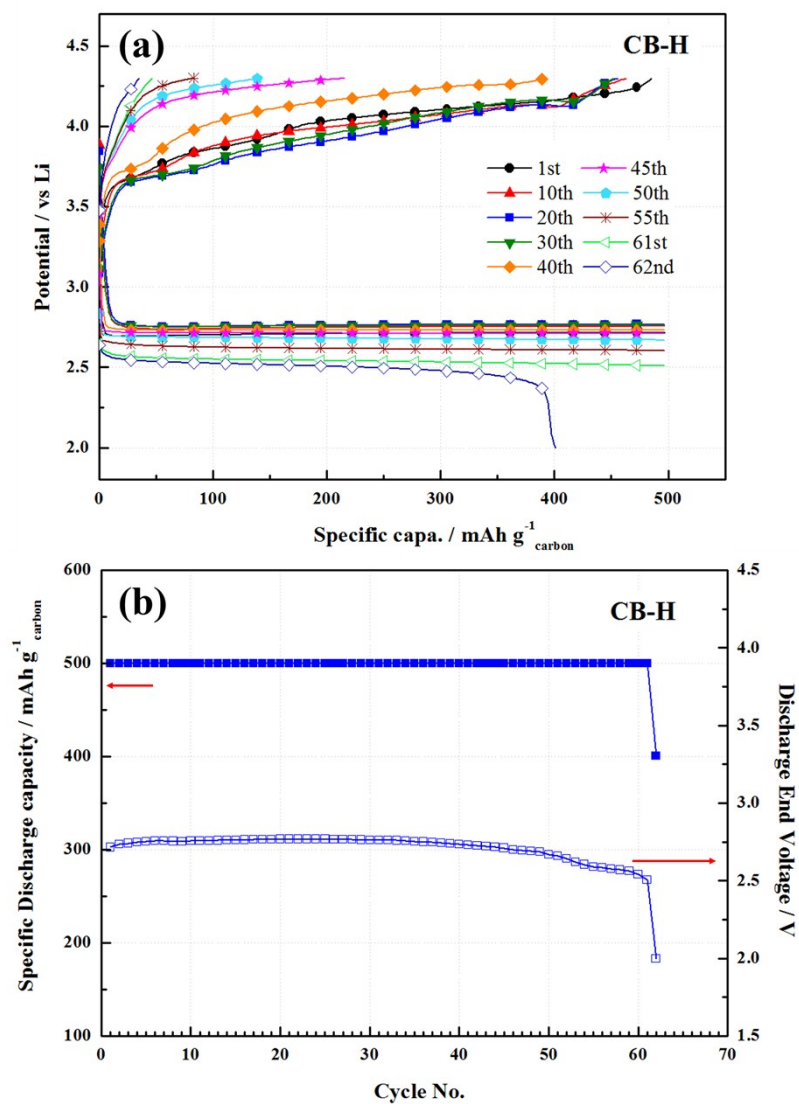

**Fig. S2** (a) Cycle stability result for CB-H at a constant current density of  $1,000 \text{ mA g}^{-1}_{\text{carbon}}$  with curtaining capacity of  $500 \text{ mAh g}^{-1}_{\text{carbon}}$  and (b) the change in discharge capacities and the discharge end voltage.

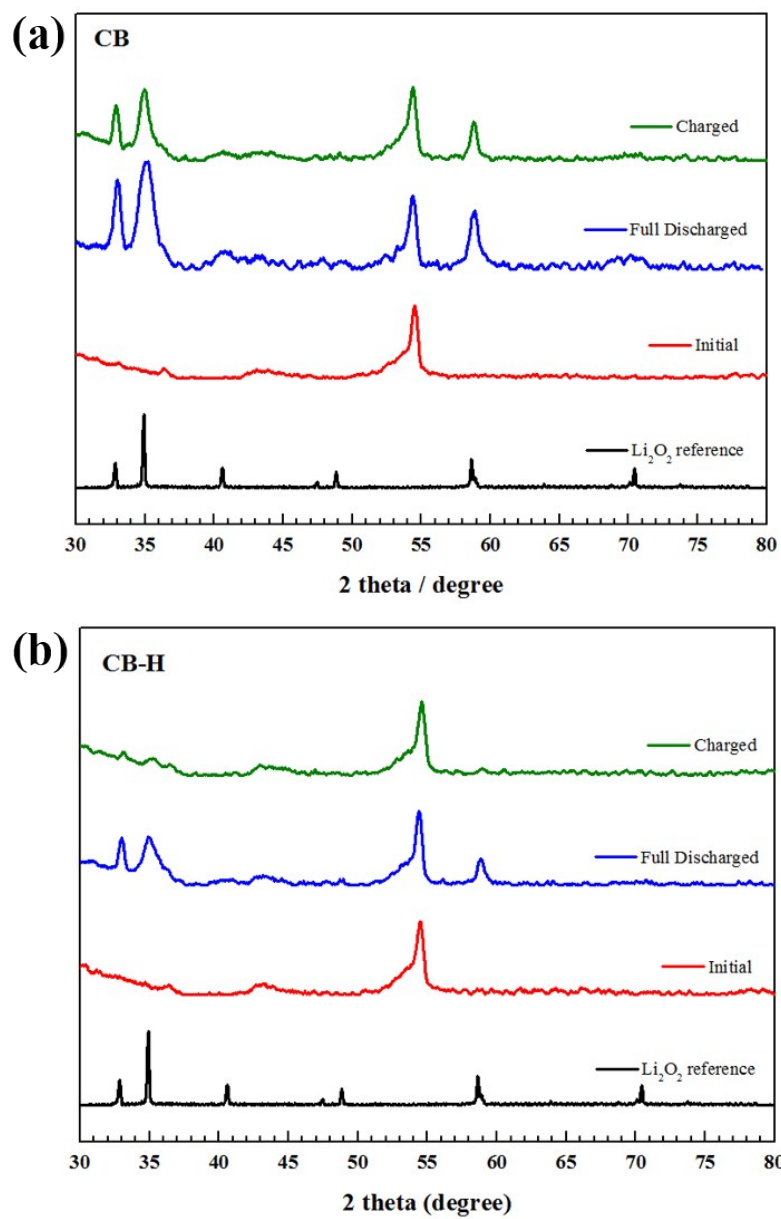

**Fig. S3** XRD spectra of (a) CB and (b) CB-H at initial, discharged, and charged states.

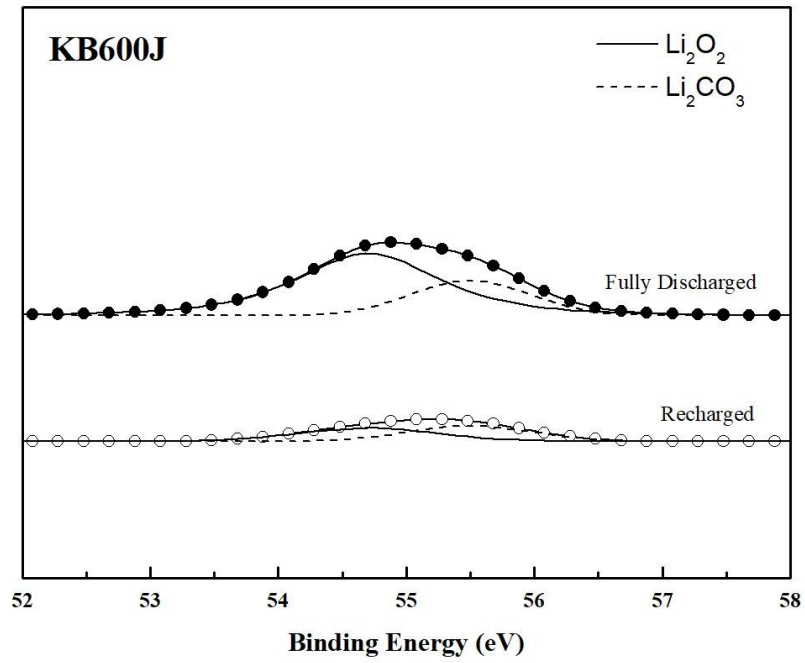

**Fig. S4** Li 1s spectra of KB600J after a full discharge and recharge process

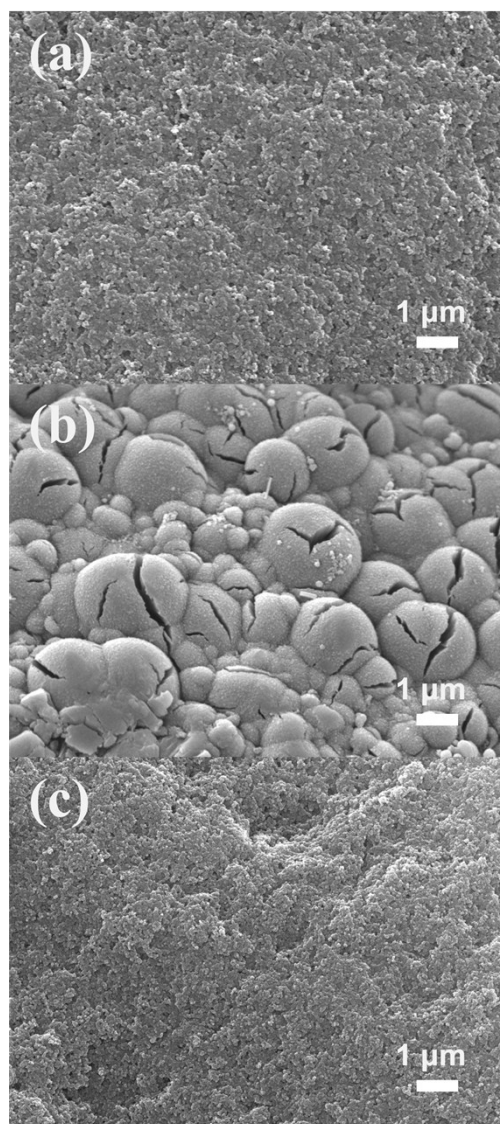

**Fig. S5** SEM images of KB600J at (a) initial, (b) fully discharged, and (c) recharged states.
